# Supplementary material
Source: Springer Nature journal article supplement (https://www.springermedizin.de/resource/supplementary/12958_2012_1056_MOESM2_ESM.pdf/9566654)

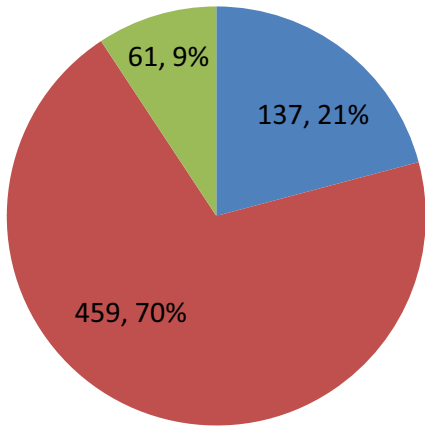

■ No pain (pain score = 0)

■ Little pain (pain score = 0.5 to 4)

■ Some pain (pain score = 5 to 10)

Supplement: MOESM2 [file 9566654]
